# Supplementary material for: Examining Spin-Up Behaviour within WRF Dynamical Downscaling Applications
Source: Copernicus journal article supplement (doi:10.5194/egusphere-2025-2352), 2025-06-03
Supplement: Supplementary file [file egusphere-2025-2352-AC2-supplement.pdf]

## Response to Reviewer 1

We greatly appreciate the comments provided by the reviewer and have incorporated their feedback, as noted in each of the comments below. The Reviewer's comments appear in black below, and our responses follow in *italicized blue text*.

### Reviewer 1

Mallard et al. tackle a key practical issue in regional climate modeling: determining how long a model should be run to remove dependence on initial conditions. This is especially relevant for multi-decade simulations. The work uses a uniquely long reference run (20-year lead) to examine spin-up, extending beyond earlier studies that only looked at shorter lead times (weeks to 2 years). The results (e.g., the need for around a year or more for spin-up, particularly for soil moisture) are valuable for guiding modeling protocols and could influence future downscaling experiment design. The manuscript is well-written and logically organized. Overall, it is a very well-executed study, and I have only one minor point that I'd like addressed before publication.

*We appreciate this positive feedback on the value of the study and unique aspects of its design, as well as the comments on the organization of the manuscript. We have incorporated the feedback the reviewer gives below to further improve the manuscript.*

That is, that the abstract and conclusion note that the results support using at least one year of spin-up. This is accurate but overemphasizes the one-year period. Since this was insufficient in some cases, I suggest clearly quantifying it in some way, in the abstract in particular - for example, acknowledging that some regions may require more.

*We highlight the need for 1 year of spin-up time as a minimum to account for seasonal effects while considering common computational limitations, but we agree that use of multi-year spin-up periods is supported by our analysis of soil conditions over regions within the central CONUS. We appreciate the feedback that this result is underemphasized within the abstract and have revised the abstract to provide more clarity in summarizing our results. The revised abstract ends with the following sentence:*

*Results from some regions of the CONUS indicate that spin-up durations of 1-4 years are needed to exclude spurious behavior in top-layer soil moisture, which exhibit prolonged spin-up compared with other near-surface variables examined here.*

Also, at line 34, "Georgi" should be "Giorgi", but this barely warrants comment

*This typo has been fixed. Thank you for catching it.*

## Response to Reviewer 2

We greatly appreciate Dr. Rahimi's comments and have included additional analysis and figures into the manuscript in response, as noted in each of the comments below. The Reviewer's comments appear in black below, and our responses follow in *italicized blue text*.

Stefan Rahimi

Synopsis: The authors compare two WRF simulations, one with 20 years and another with 3 months of spin-up to assess the time scales over which two dynamically downscaled ESMs converge in terms of their soil moisture, temperature, 2-m temperature, and sensible and latent heat fluxes. They also looked at this convergence as a function of NCA region, adding another line of evidence that spin-up time is a strong function of region. While I believe that some within the regional downscaling community will not see this finding as surprising or novel, I believe that it is critical to continue revisiting questions of spin-up length, as many in the dynamical downscaling community (including me) continue to attempt to parallelize experiments across regions with smaller and smaller amounts of spin-up time to finish simulations faster. Continuous testing of spin-up is further warranted given that newer land-surface models (LSMs) continue to roll out more sophisticated and complex solvers, which may behave differently from previous generations of LSMs in terms of spin-up, potentially necessitating continuous updating of community spin-up standards. I really like the idea of giving variable-specific spin-up times in the final table of the manuscript, as it is something that folks downscaling on sub-regional scales can directly point to as a starting point in their spin-up times, and it provides a comparative benchmark to those who will contribute future studies on spin-up time length. I recommend publication of this manuscript following revisions below.

*We appreciate this feedback on the value of regionally-based results, both for those applying RCMs at regional scales and also to show how spin-up time varies across areas of the CONUS. We agree that ongoing testing of various spin-up times has the advantage of addressing changes in spin-up across updates and variations in model physics, even within the WRF community, and have included more language in the revised manuscript acknowledging that sensitivity (as detailed below). We have also expanded Table 1 in the revised manuscript to give additional information on variable-specific spin-up times, as a part of our inclusion of analysis of precipitation among the other variables already discussed in the article (as described further below).*

- Question: Why was 1994 chosen instead of 1984 or 2004? Was WY 1995 in the ESM/WRF an average precipitation year? Wet? Dry?

1. The I94 simulations were set up with an end date of 1 Jan 2006 and an 11-year analysis period based on 1) the availability of CMIP5 global simulations for a historical period through 2005, 2) a desire to examine recent historical periods based on priorities within the Environmental Protection Agency, and 3) consideration of computational limitations. Subsequently, additional computational resources allowed us to expand to a 31-year period. The composition and expansion of the EDDE dataset, as well as the motivation behind its development, is described in detail in Spero et al. (2025), which is first referenced in the manuscript on line 77 upon introduction of the EDDE ensemble. So that this information can be more easily found, we have revised the manuscript to a more specific reference to Spero et al. (lines 101-102): “As discussed in Spero et al. (2025; their Section 2), a more prolonged historical period was later produced with a matching model configuration.”

In order to address the reviewer’s query about how to best characterize the 1995 water year, below we show a 31-year timeseries of monthly precipitation over the CONUS for I74, including the 11-year timeseries of simulated rainfall from I94 (Fig. R1). October 1994 and the proceeding water year do not appear to be anomalously wet or dry years, as compared to variability over the course of the timeseries. Although we have not examined precipitation directly from CESM for this period, both the I94 and I74 runs driven by boundary conditions and large-scale nudging from CESM simulate precipitation values for the period around initialization that appear to be well within the variability shown throughout the timeseries for the period of October 1974 through December 2005. When examining differences in precipitation over water year 1995, I94 does have ~5% more precipitation during the summer of 1995, relative to I74, when examining average seasonal precipitation for the June-July-August period. This increase in precipitation during 1995 is further discussed in the revised manuscript and in our responses below.

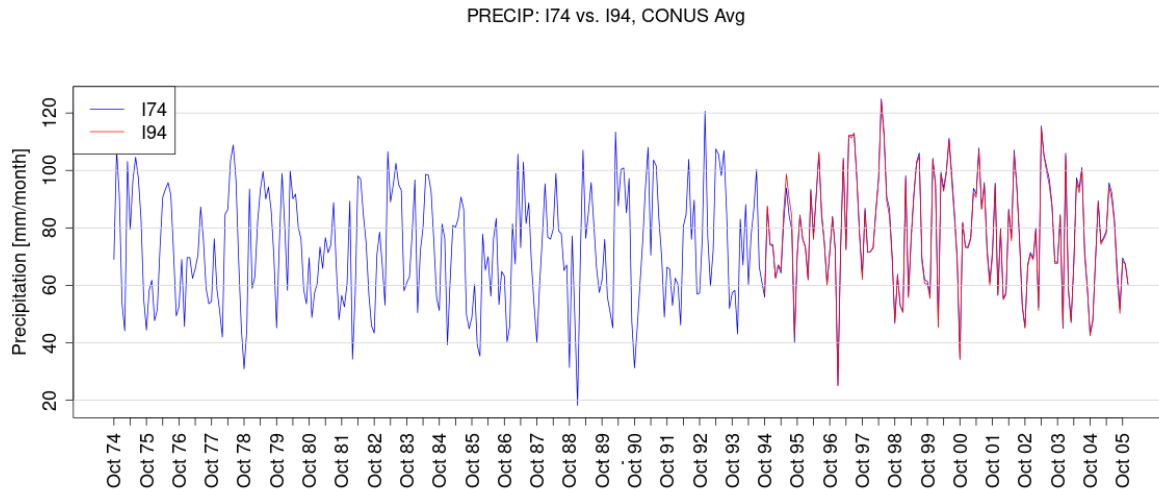

**Fig. R1.** Total precipitation (in mm per month) spatially averaged over land cells within the CONUS for the I74 (blue) and I94 (red) simulations shown over the period 1974-2005, with the shorter simulation only shown over the later portion of the period.

- Line 110: What is the intensity of the spectral nudging employed here, and which relaxation and wavenumber values were used?

2. We have included further detail in the revised manuscript on where this information can be found in a prior study. The nudging coefficients and wavenumbers follow those used by Otte et al. (2012) within their Table 1 (excluding the analysis nudging settings, which are not employed for any runs examined in the present study). Otte et al. is referenced in the manuscript (see line 112), and the reference has been modified to specify that these settings can be found in their Table 1.

- 3: Maybe I missed this, but is the warmth in I94 across south-central Canada explained (Figs. 2, 3)? The following summer's relative coldness in the 2-m temperature and links to evaporative cooling are well-explained, but I couldn't seem to find this same physical argument for the preceding winter's warmth? Is this perhaps a snow difference between the two simulations?

3. It is correct that the present study only briefly discusses the differences between I94 and I74 that fall mainly into the Canadian portion of the modeling domain (on lines 161-164). We briefly note the warmer winter temperatures and speculate that frozen soils and snow cover may influence differences found there. As a federal Agency, we have chosen to focus on the contiguous U.S. within this study. However, we did examine snow cover over the entire domain within the cohort of variables we compared between I74 and I94. When examining snow coverage over that first winter of 1994-1995, we did not find a systematic

*decrease in snow water equivalent (SWE) over the northern areas of the domain including Canada and the CONUS (Fig. R2). Instead, a mix of positive and negative differences is present over northern areas of the domain, including throughout central Canada where the temperature differences being discussed are found (Fig. 3 within the manuscript). When averaged over all land points during the winter of 1994-1995, SWE is reduced by only 0.4 kg m<sup>-2</sup> (or 0.8%) in I94 relative to I74. Therefore, in our analysis focused on key differences over the CONUS, we ultimately did not include snow among the discussed variables in the manuscript.*

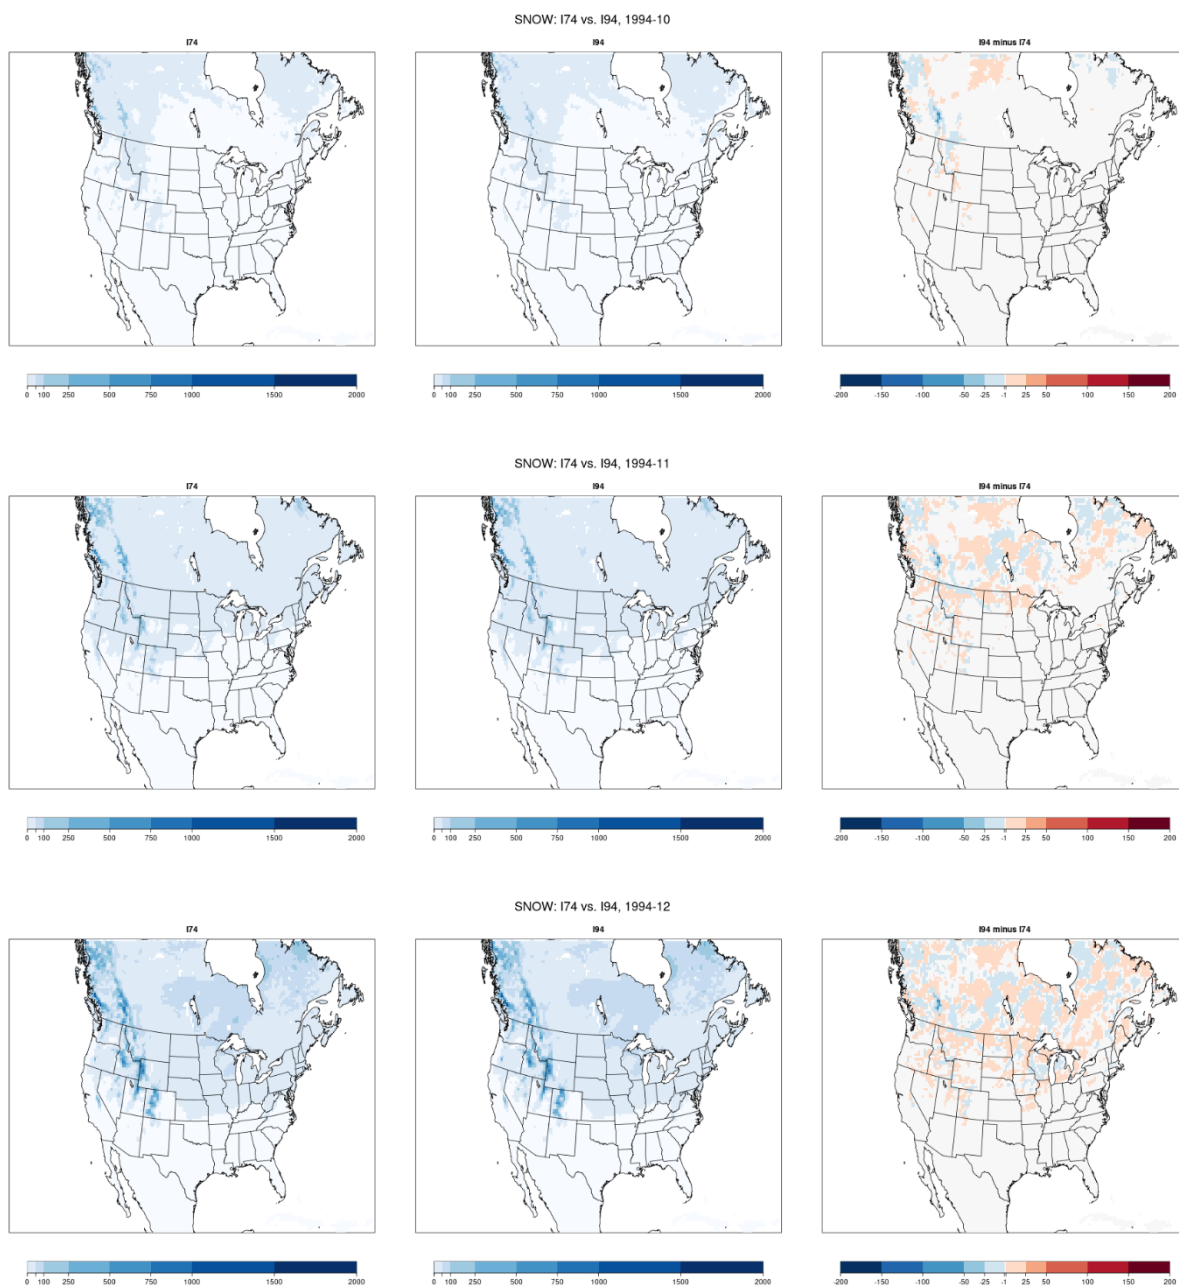

**Fig. R2.** Monthly-averaged snow water equivalent (kg m<sup>-2</sup>) for I74 (left) and I94 (middle), plotted alongside the difference taken as I94 minus I74 (right) for the months of October 1994 (top), November 1994 (middle), and December 1994 (bottom).

The differences in soil temperature and moisture are notable over this portion of the domain falling outside the CONUS and a future study focused on processes in the cryosphere utilizing the EDDE data on Amazon Web Services Open Data Project could

*further examine this area. However, such a study does not align with the focus on the CONUS employed within the current study due to Agency priorities.*

- Lines 249-270: It would be helpful in this table to provide each regions annual precipitation amount given the tie ins with the Cosgrove et al. (2003) finding. WRF has been updated a lot over the past several decades....do the Cosgrove et al. findings still hold up ‘e.g., easier to spin up wet vs. dry soils?’

*4. The authors agree that the spin-up lengths discussed in Section 3.4 and Table 1 can be expected to be sensitive to changes in model physics, especially when considering the LSM and its effect on soil fields discussed here. We have revised the article to include a sentence further highlighting this expected sensitivity within Section 3.4 (see lines 258-260 of the revised manuscript): “Additionally, spin-up times found here can be expected to be sensitive to choice of model physics (e.g., Cosgrove et al. 2003; Jankov et al., 2007; Kleczek et al., 2014; Tewari et al., 2022).”*

*While the present study does share quantitative results from Cosgrove et al. within Section 1, the conclusion from the Cosgrove study that is of most consequence to the present work is that spin-up times are influenced by the timescales of key processes needed to resolve the anomalies present in the initial fields; more specifically, it was concluded in that work that relatively wet and dry soils will be dependent on the timescales of evaporation and precipitation, respectively. The present work features generally wet soil anomalies at both the upper and mid- to bottom-layers (Figs. 3 and 4 in the manuscript). Therefore, evaporation is a key process that is heavily discussed in our results. However, we include the discussion of Cosgrove et al. in Section 3.4 to communicate to the reader our speculation that, if our analysis had found dry soil anomalies of similar magnitude in I94, spin-up times could have been even more prolonged. As we do not have an idealized simulation to test this hypothesis with, we present it as speculation and have further revised the article to properly caveat our comparison to Cosgrove et al. at lines 284-285: “However, the present work does not include an idealized simulation set up with dry soil anomalies to test this hypothesis and compare directly to results from Cosgrove et al.”*

*To further address the reviewer’s concerns, we have included Table R1 below with annual totals in precipitation over water year 1995. Precipitation is increased in the I94 simulation, relative to I74, by ~3% as averaged across the CONUS. Differences in the westernmost regions (Northwest, West, & Southwest) and the Northeast are less than 1%. However, regions in the central portions of the CONUS (Northern Rockies and Plains, Upper Midwest, and Ohio Valley) feature the largest differences among the simulations, with the I94 having ~4-9% more precipitation than I74 over this period.*



Increased precipitation in this area is also consistent with Fig. 8 which was added to the revised manuscript in response to the reviewer's comment below. Generally, the contrast between I94 and I74 features generally wet soils and increased precipitation. However, an idealized simulation with similarly dry soil anomalies could be a focus of future work to better understand the role of precipitation and interactions with relatively dry soils and their effect on spin-up duration.

|                                | I74 [mm] | I94 [mm] | Difference [mm]<br>(I94-I74) | Difference<br>(%) |
|--------------------------------|----------|----------|------------------------------|-------------------|
| CONUS                          | 864.31   | 888.32   | 24.01                        | 2.78              |
| Northwest                      | 1351.92  | 1352.19  | 0.27                         | 0.02              |
| West                           | 669.87   | 673.30   | 3.43                         | 0.51              |
| Northern Rockies<br>and Plains | 687.44   | 748.96   | 61.52                        | 8.95              |
| Southwest                      | 606.86   | 603.54   | -3.32                        | -0.55             |
| Upper Midwest                  | 849.50   | 911.36   | 61.86                        | 7.28              |
| South                          | 660.75   | 686.94   | 26.20                        | 3.96              |
| Ohio Valley                    | 1081.14  | 1150.71  | 69.57                        | 6.44              |
| Southeast                      | 1224.71  | 1187.92  | -36.79                       | -3.00             |
| Northeast                      | 1255.34  | 1266.16  | 10.83                        | 0.86              |

**Table R1.** Total precipitation [mm] over water year 1995 (1 October 1994 through 30 September 1995), spatially averaged over the CONUS and each of the 9 NCEI regions (manuscript's Fig. 1), shown alongside differences in precipitation shown in mm and as a percentage and taken as I94 minus I74.

- 2-6: Would be nice to see the same figures but for precipitation

5. Such a figure has been included in the revised draft as Figure 8. It, and an accompanying discussion, can be found on pages 15-16 of the revised manuscript. Generally, during the 1994 through 1995 period, precipitation is found to increase in the central and eastern portions of the CONUS for I94 relative to I74. Similar to other variables, a seasonal cycle is evident, as precipitation differences between the runs decrease in magnitude the winter months and re-emerge and increase during the following summer. As both simulations have matching boundary conditions, we assert that increased soil moisture and evaporation enhance precipitation in the central and eastern CONUS.

We have also revised Table 1 in the manuscript to include a quantitative examination of daily precipitation, alongside the other previously discussed variables. Our results do show that precipitation over the CONUS meets the applied spin-up criteria within the first annual window tested (days 1-364). This finding is consistent



*with results from Jerez et al. (2020), with that study using a similar statistical test (as discussed in the first paragraph of Section 3.4) and concluding that simulated precipitation satisfied their spin-up criteria within the first week of WRF runs over a European domain. However, in the present work, it is found that some regions through the central CONUS do not meet the criteria for spin-up until 1.4-5.8 months has elapsed. As discussed in Sections 3.3 & 3.4, as these regions also experience increased soil moisture and prolonged spin-up times for top-layer soil moisture, we hypothesize that precipitation differences are influenced by differences in the initial soil state of the runs. Boundary conditions, and therefore long-range moisture transport, is matched between the runs and precipitation differences over the CONUS would be driven by changes in both local and upstream evaporation within the domain.*

# Examining Spin-Up Behaviour within WRF Dynamical Downscaling Applications

Megan S. Mallard<sup>1</sup>, Tanya L. Spero<sup>1</sup>, Jared H. Bowden<sup>2</sup>, Jeff Willison<sup>1</sup>, Christopher G. Nolte<sup>1</sup>, Anna M. Jalowska<sup>1</sup>

<sup>1</sup>~~Office of Research and Development, U~~<sup>1</sup>U.S. Environmental Protection Agency, Research Triangle Park, North Carolina, USA

<sup>2</sup>North Carolina State Climate Office, Raleigh, North Carolina, USA

Correspondence to: Megan S. Mallard (mallard.megan@epa.gov)

**Abstract.** Spin-up is the period after initialization when a model transitions away from its dependence on initial conditions toward a dynamic equilibrium between driving boundary conditions and its own internal dynamics. Regional climate models (RCMs) are often used to simulate conditions over several decades to inform local adaptation and resilience activities. The spin-up period represents added cost to already resource-intensive simulations, and it is often infeasible to use a spin-up period that produces complete model equilibrium. Therefore, a pragmatic compromise is desired to minimize the effects of spin-up. Here, two overlapping dynamically downscaled simulations (~~31-year and 11-year integrations~~) using the Weather Research and Forecasting model over the contiguous U.S. (~~31-year and 11-year integrations~~-CONUS) are used to explore convergence associated with model spin-up. The shorter simulation is initialized 20 years after initialization of the longer (reference) run, and the runs are analysed over the period covered by both simulations, giving the reference simulation a 20-year period to attain spin-up prior to comparison. After initialization, the shorter run features cooler surface and near-surface temperatures and greater soil moisture compared to the reference simulation. Differences between the runs decrease in magnitude over the first 3 months as autumn transitions to winter; however, these differences re-emerge and reach a secondary peak during the proceeding spring and summer. During this warm season, evaporation and accompanying evaporative cooling increase and temperature differences between the simulations re-emerge. These results support using at least one year of spin-up time in RCM applications to account for the seasonality of spin-up behaviour. Results from some regions of the CONUS indicate that spin-up durations of 1-4 years are needed to exclude spurious behavior in top-layer soil moisture, which exhibit prolonged spin-up compared with other near-surface variables examined here.

## 1 Introduction

Regional climate modelling, or dynamical downscaling, applications provide data to inform adaptation and resiliency at local and community scales, including extremes in near-surface temperature or precipitation. One benefit of using dynamical downscaling (as opposed to statistical downscaling) is that a dynamically consistent suite of three-dimensional (3D) fields is created at sufficient temporal frequency to drive other environmental models, such as air quality or hydrology models.

Generating credible dynamical downscaling outputs can present several challenges to serve a variety of applications while remaining computationally manageable.

In general, a spin-up period follows model initialization to allow the model solution to transition from being strongly influenced by the initial condition to a state of dynamic equilibrium between the model physics and boundary forcing from the driving dataset (GeorgiGiorgi and Mearns, 1999; Denis et al., 2002). Therefore, the spin-up is a period over which the model initial conditions are “forgotten” as information from the lateral boundaries and the model’s internal physics generate this equilibrium. Long-running simulations (such as those generated by dynamical downscaling) with the same driving conditions should converge towards more similar results as the influence of their initial conditions lessens over time.

In dynamical downscaling, spin-up time can be influenced by several factors, such as the size of the model domain (Leduc and Laprise, 2009), physics configuration (e.g., Jankov et al., 2007; Kleczek et al., 2014; Tewari et al., 2022), or including erroneous or poorly resolved features in initial conditions (e.g., Cosgrove et al., 2003; Jerez et al., 2020). Spin-up periods may also be chosen to ensure the initialization captures antecedent conditions or steering flow within a case study (e.g., Denis et al., 2002; Liu et al., 2023). Selecting a spin-up period can be critical to minimize the effects of spurious behaviour within regional climate model (RCM) simulations that are run “in parallel” (utilizing multiple initializations to break the simulated period into several segments), resulting in multiple spin-up periods throughout the simulation (e.g., Lavin-Gullon et al., 2023; Rahimi et al., 2024).

Jerez et al. (2020) examined spin-up duration and the influence of seasonality using the Weather Research and Forecasting (WRF) model as an RCM for a European domain with 50-km grid spacing, with driving conditions provided by a global climate model (GCM) from the 5<sup>th</sup> Coupled Model Intercomparison Project (CMIP5) (Taylor et al., 2012). Simulations of various lengths were compared to a reference simulation that was initialized 2 years prior and both atmospheric and soil fields were included in the analysis. Although Jerez et al. concluded that 2-m temperature and precipitation were spun up after one week, a 6-month spin-up period was recommended as a general guideline for RCM applications when assessing optimal model performance across both atmospheric and soil conditions. They note that longer spin-up periods can be required when key physical mechanisms considered in the application are dependent on soil conditions, as longer times are needed for soil conditions to converge towards the reference simulation. However, Jerez et al. concluded that even one year—the longest period considered in the study—was insufficient for deep soil moisture to approach equilibrium.

Cosgrove et al. (2003) conducted a spin-up study focused on soil conditions within the North American Land Data Assimilation System (NLDAS, spatial resolution of 0.125°) utilizing 4 different land surface models (LSMs) across various experiments, which were driven by external meteorological forcing. They found multi-year spin-up times were needed for soil conditions in each LSM, including the Noah LSM. Cosgrove et al. performed recursive experiments with the same driving data used over 11 annual cycles to give several years for the LSM to approach equilibrium with the driving conditions. They found that the soil fields could require more than 10 years to achieve a “fine-scale equilibrium” over their domain covering the contiguous U.S. (CONUS). For that study, the timing for this equilibrium was assessed by comparing the same month in each of the

65 annual cycles and equilibrium was achieved when the percentage change compared to the last annual cycle was less than 0.01%.

Cosgrove et al. highlighted the influence of the physical processes in the LSM that are utilized to “forget” erroneous conditions in the initial state to achieve spin-up of land-surface conditions. They compared a reanalysis-driven LSM simulation to idealized experimental runs where soil moisture was represented by either idealized “dry” and “wet” initial conditions. The wet run converged toward the reanalysis-driven simulation relatively quickly, with the control and wet simulations achieving a “practical” equilibrium (percentage change < 1%) at ~1-2 years, respectively. Meanwhile, the dry run took an additional 3-4 years (in comparison to the control simulation) to achieve this metric of spin-up. Cosgrove et al. concluded that the wet simulation could immediately spur evaporation to reduce high saturation deficits, but the drier run required sufficient precipitation to moisten the soil and converge toward the reference solution. Therefore, longer spin-up times can be expected when the model relies on intermittent dynamical processes (such as precipitation) to reduce the influence of its initial conditions over time.

Here, spin-up time is examined using simulations from the EPA Dynamically Downscaled Ensemble (EDDE) Version 1 dataset (Nolte et al., 2021; EPA, 2024, 2025; Spero et al., 2025). EDDE contains dynamically downscaled projections of various CMIP5 GCMs using the WRF model in the historical past and under various future scenarios (van Vuuren et al., 2011). While early work testing an experimental set-up for EDDE used spin-up periods of 1-2 months (Otte et al., 2012; Bowden et al., 2012), the EDDE Version 1 methodology employed a 3-month spin-up period (Nolte et al., 2018; Nolte et al., 2021). These spin-up periods are comparable to those used by other dynamical downscaling applications. However, this aspect of the methodologies employed for regional climate and dynamically downscaled simulations vary widely. Representative examples range from the 1-month spin-up periods employed within the Western US Dynamically Downscaled Dataset (WUS-D3) dataset (Rahimi et al., 2024) to the 1-year of spin-up recommended by guidance within the COordinated Regional climate Downscaling EXperiment (CORDEX, 2021). Choices in spin-up among these applications can be determined based on which physical processes and affected outputs are considered most important for their respective applications, the physics of the underlying RCM being used, and compromises imposed by limited computational resources that constrain the total length of a simulation.

Here, to assess the effects of spin-up behaviour using the EDDE data, two EDDE historical simulations that are initialized 20 years apart are analysed over an 11-year overlapping period. This framework facilitates analysis of the spin-up of atmospheric variables and soil conditions by comparison against a reference simulation that has two decades to spin up. This analysis advances upon prior studies that used sub-decadal timescales to examine spin-up of a full 3D RCM.

## 2 Methods

Two RCM simulations are driven by the Community Earth System Model (CESM, archived resolution of  $0.9^\circ \times 1.25^\circ$ ) (Gent et al., 2011) for overlapping historical periods using version 3.4.1 of the WRF model (Skamarock and Klemp, 2008) on a 36-

km domain (Fig. 1). The simulations used 34 terrain-following layers extending to a model top at 50 hPa. Both runs are initialized at 00 UTC on 1 October, with simulation “I74” initialized in 1974 and “I94” initialized in 1994. Both I74 and I94 are continuous integrations with only a single initialization. Both runs end at 00 UTC on 1 January 2006, such that I74 covers a 31-year and 3-month period, while I94 covers the last 11 years and 3 months of I74. I94 has been used to examine the impacts of climate change on air quality (Fann et al., 2015; Nolte et al., 2018, 2021) and phenological indicators (Mallard et al., 2023). I74As discussed in Spero et al. (2025; their Section 2), a more prolonged historical period was later produced with a matching model configuration. This simulation, I74, was used to simulate extreme rainfall events to create rainfall intensity-duration-frequency curves (Jalowska et al., 2021).

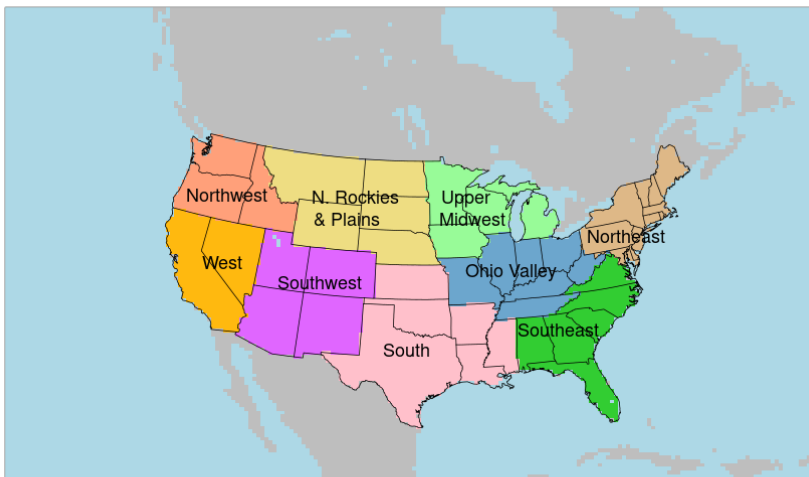

**Figure 1. The 36-km WRF domain used for simulations I74 and I94, with the nine National Centers for Environmental Information (NCEI) regions shown within the CONUS.**

Both WRF runs use matching physics configurations including the Kain-Fritsch scheme to parameterize convection (Kain, 2004) with radiative feedback following Herwehe et al. (2014), WSM6 microphysics (Hong and Lim, 2006), the Yonsei University planetary boundary layer (PBL) scheme (Hong et al., 2006), and the Rapid Radiative Transfer Model for global models (Iacono et al., 2008) for longwave and shortwave radiation. Spectral nudging (Miguez-Macho et al., 2004) is applied to geopotential heights, horizontal wind components, and temperature following Otte et al. (2012; their Table 1).

Although spectral nudging may influence spin-up behaviour (Gómez and Míguez-Macho, 2017), nudging is applied here only to large-scale atmospheric features above the PBL and not to specific humidity. Near-surface vapor pressure deficit is allowed to evolve without direct influence from spectral nudging. Gómez and Míguez-Macho (2017) demonstrated the influence of nudging on spin-up time and concluded that the simulation with spectral nudging (similarly, applied above the PBL) had a faster spin-up time (at ~36–48 hours) relative to a simulation with no nudging applied (at 96 hours). Meanwhile, a grid nudged simulation was found to reach spin-up the fastest of all runs. The authors concluded that this most constrained simulation (with nudging applied across the entire energy spectra) allowed the grid nudged simulation to reach a balance between the nudging influence and its own internal dynamics relatively quickly; meanwhile, the simulation without nudging had the least constraint and the longest spin-up time. Therefore, while nudging has been found to effect spin-up, these prior results suggest its influence is found at temporal scales of hours to a few days and not at the longer timescales more typical of spin-up in RCM applications.

The Noah LSM (Chen and Dudhia, 2001) and the Revised MM5 Monin-Obukhov surface scheme (Jimenez et al., 2012) are used to simulate soil and surface ~~and soil~~ processes. The Noah LSM has 4 soil layers (0–10, 10–40, 40–100, and 100–200 cm, respectively, from top to bottom), and gravitational flow is allowed out of the bottom layer. Monthly average soil temperature and moisture from CESM provide initial soil conditions for WRF. The 24-category U. S. Geological Survey (USGS) land use dataset provides landuse information (Loveland et al., 2000), and lake surface temperatures are incorporated from the CESM Community Land Model as described in Spero et al. (2016).

### 3 Results

I74 and I94 are compared using several atmospheric and soil fields during the overlap in their simulation periods. In this analysis, I74—which was initialized 20 years prior to the start of I94—serves as the reference simulation. It is assumed that the atmospheric and soil fields in I74 are in equilibrium prior to the initialization of I94. The analysis period begins at 00 UTC 1 October 1994 (the initialization time for I94) and ends at 00 UTC 1 January 2006.

#### 3.1 2-m Temperature

At initialization in October 1994, the CONUS-wide average 2-m temperature from I94 is ~0.4 K cooler than I74 (Figs. 2a & 2b). Although the averaged difference between the runs diminishes rapidly from ~0.4 K in magnitude to <0.1 K in the first 3 months after initialization, it diverges the following spring and forms a secondary peak in magnitude of ~-0.15 K during the summer of 1995 (Fig. 2b). Seasonally averaged differences in 2-m temperature are shown for the first winter (December 1994–February 1995) and first summer (June–August 1995) of I94, compared with I74 (Figs. 2c & 2d, respectively). During the first winter, I94 is notably cooler than I74 in the South [specifically, the states of Texas, Louisiana, Mississippi, and Arkansas; which are located in the southeastern portion of the South NCEI region (Fig. 1)]. By the following summer, I94 has cooler temperatures than I74 across portions of the South, Ohio Valley, Upper Midwest, and Northern Rockies and Plains regions (Fig., 2d), while CONUS-averaged differences reaching a secondary low of ~-0.15 K (Fig. 2b). Although a seasonal

cycle of convergence followed by a re-emergence of temperature differences occurs during this first year of the timeseries, from the beginning of 1996 and onward, the monthly and spatially averaged 2-m temperatures differ by less than  $\pm 0.05$  K over the rest of the decadal period.

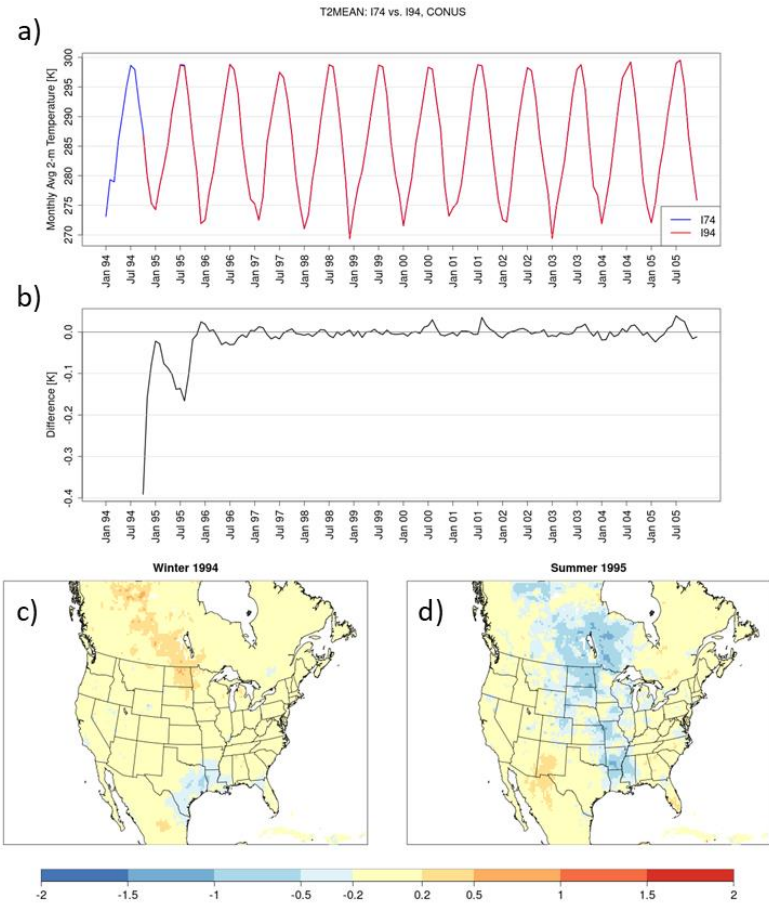

150 Figure 2. A timeseries beginning in January 1994 of monthly and spatially averaged 2-m temperature [K] over the CONUS for I74 (blue) and I94 (red) (panel a) and the difference between those timeseries beginning in October 1994 (I94 minus I74; panel b). The difference (I94 minus I74) in seasonally averaged 2-m temperature [K] for the first winter



(~~panel e~~, December 1994–February 1995; panel c) and summer (~~panel d~~, June–August 1995; panel d) following initialization.

### 3.2 Soil Temperature and Moisture

A seasonal cycle is also apparent in top-layer (0–10 cm) soil temperatures (Figs. 3a and 3b). Over the CONUS, soil temperature shortly after initialization is colder in I94 than I74 for both top-layer (Figs. 3e3a and 3d3b) and lower-layer soil temperatures (not shown). The magnitude of the monthly and spatially averaged differences in top-layer soil temperature exceeds those of 2-m temperatures over the CONUS but follows a similar pattern of convergence (decreasing in magnitude) over the initial transitional season, followed by a divergence during the subsequent spring and summer where a secondary peak in the magnitude of difference between the two simulations occurs. During summer 1995, differences in soil temperature are largest in areas of the central CONUS, corresponding to differences in 2-m temperature (Figs. 2d and 3d).

While 1994–1995 wintertime differences in soil temperature are relatively small over the CONUS (approximately  $\pm 1$  K), the differences are accentuated in the Canadian Prairies (Fig. 3c). Portions of the model domain in Canada exhibit substantially warmer temperatures within top and deeper layer (not shown) soil temperatures during this period. Land-surface processes in frozen soils and snow cover may impact spin-up in those areas.

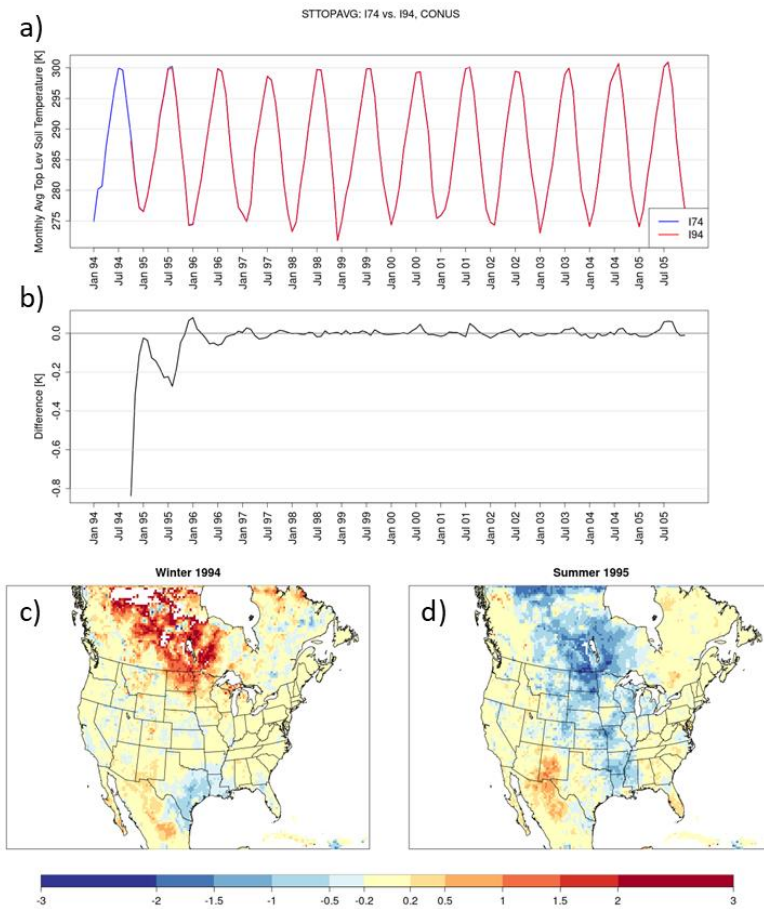

**Figure 3.** As in Fig. 2 but for top-level (0-10 cm) soil temperature [K].

170 Alongside cooler temperatures at the surface and near-surface in the I94 initialization relative to I74, generally soil moisture values are also wetter in the top layer (Fig. 4) and deeper layers (Fig. 5). A timeseries of monthly-average top-layer soil moisture (Figs. 4a and 4b) shows that most of the convergence between the two simulations occurs within the first 15 months as soil moisture generally decreases in I94 relative to I74. Over the first winter following initialization, wet and dry biases (in

194 compared against 174) are present across the CONUS but greater soil moisture is found throughout much of the central U.S. (Fig. 4c). Similar to surface and near-surface temperatures, CONUS-average top-layer soil moisture exhibits a seasonally influenced cycle of rapid convergence over the first few months followed by divergence and a secondary peak in summer 1995 when wet biases are increased throughout the central CONUS (Figs. 4b & 4d).

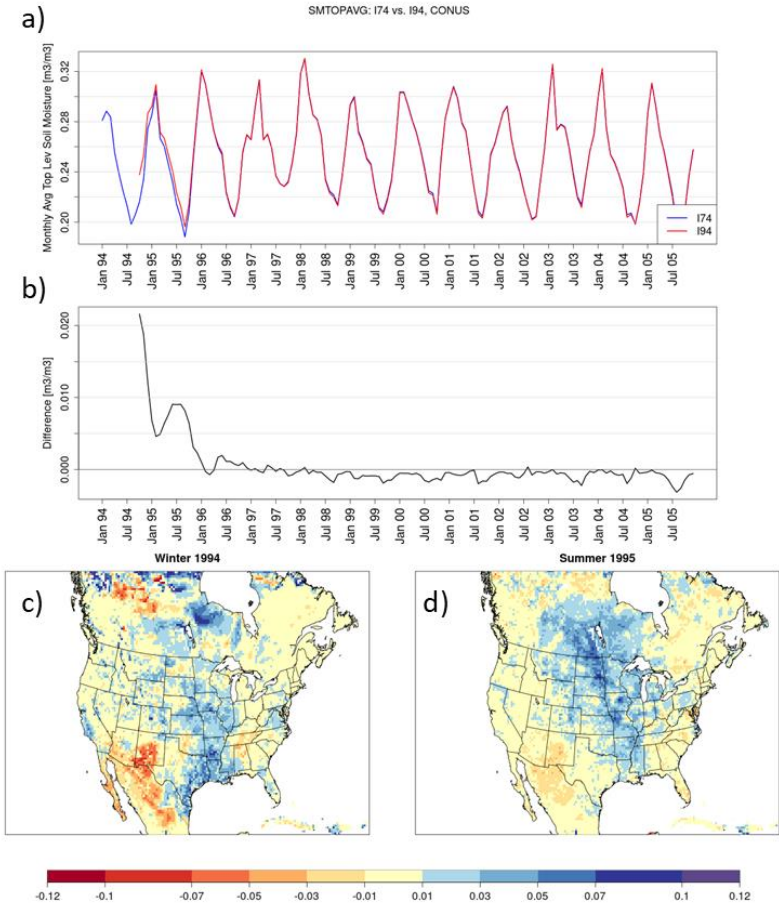

Figure 4. As in Fig. 2 but for top-layer (0-10 cm) soil moisture expressed as water fraction by volume [m<sup>3</sup> m<sup>-3</sup>].

180 Differences in mid- and bottom-layer soil moisture between I74 and I94 persist longer (Figs. 5a and 5b) than differences in 2-  
m temperature and top-layer soil temperature and moisture. Prior studies have found that deep soil moisture requires longer  
spin-up durations than other LSM variables, spanning years to decadal periods (e.g., Cosgrove, 2003; Jerez et al., 2020). Also,  
unlike the top-layer soil temperature and moisture, a seasonal cycle is not apparent over the 1994-1995 period in lower-layer  
soil moisture (Fig. 5). Instead, higher mid- and deep-soil moisture over the CONUS in I94 decreases precipitously towards  
185 I74 throughout 1995 and finally converges in the summer of 1996, with minimal CONUS-averaged differences over the rest  
of the simulation (Figs. 5a & 5b).

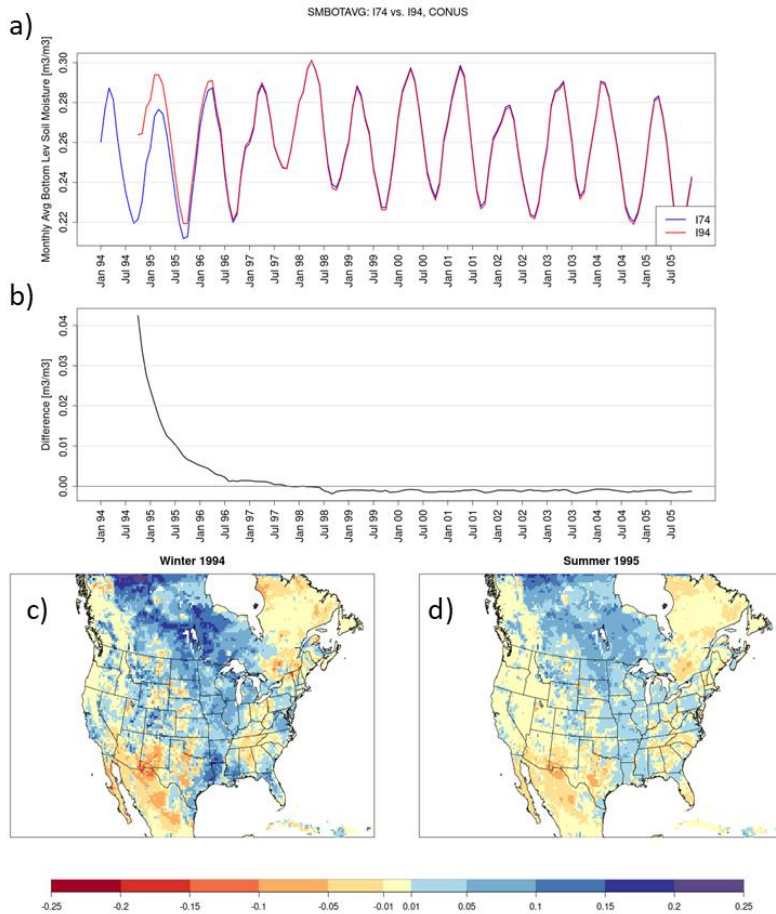

Figure 5. As in Fig. 2 but for lower-layer soil moisture [ $\text{m}^3 \text{m}^{-3}$ ] from three layers aggregated over 10–200 cm using a depth-weighted average. Note that, for brevity, this study aggregates the soil fields shown in Fig. 5 by using weighted average (by depth) soil moisture over the bottom 3 soil layers.

### 3.3 Latent and Sensible Surface Heat Fluxes and Precipitation

The I94 simulation has a soil state that is wet and cool relative to I74 throughout areas of the central CONUS (Figs. 3 & 4). In WRF, the LSM interacts with the overlying atmosphere via turbulent fluxes of heat and moisture. In the months following initialization, latent heat flux in I94 (Figs. 6a and 6b) is higher than in I74, while sensible heat flux (Figs. 7a and 7b) is reduced relative to I74. This is physically consistent with a top-layer soil state with greater moisture and cooler temperatures. The timeseries of monthly and spatially averaged surface fluxes in I94 converge towards I74 over the first ~3 months of simulation time, with differences in fluxes most apparent only in the South during winter 1994 (Figs. 6b & 6c). During the following summer, a secondary peak in increased latent heat flux in I94 occurs in the timeseries, as evaporation increases within I94 relative to I74 across the central CONUS, extending from the South through the Ohio Valley, Upper Midwest, and Northern Rockies and Plains (Fig. 6d). These areas of the central CONUS that exhibit the largest differences in surface and near-surface temperature and moisture are dominated by various forest, cropland, and pasture landuse types, as shown by Mallard et al. (2018; their Fig. 2) in similar 36-km WRF simulations utilizing the USGS landuse data. Meanwhile, sensible heat flux is lower in I94 than in I74 over the central CONUS during the first summer of the simulation over the central CONUS (Fig. 7d), which is consistent with cooler top-layer soil temperatures in I94 (Fig. 3d).

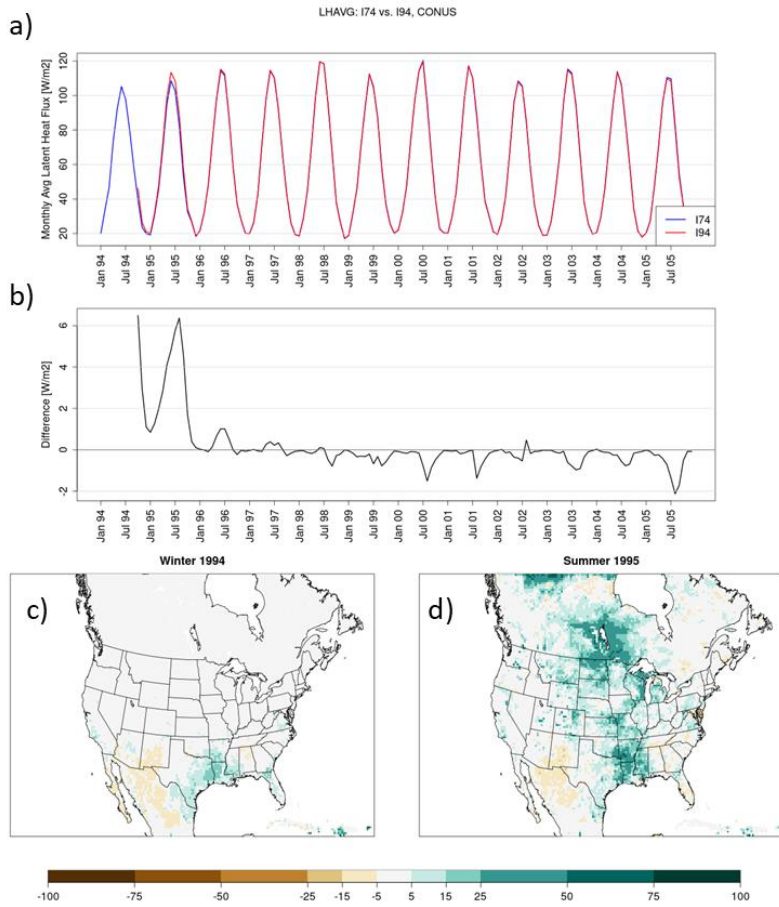

Figure 6. As in Fig. 2 but for latent heat flux [ $\text{W m}^{-2}$ ].



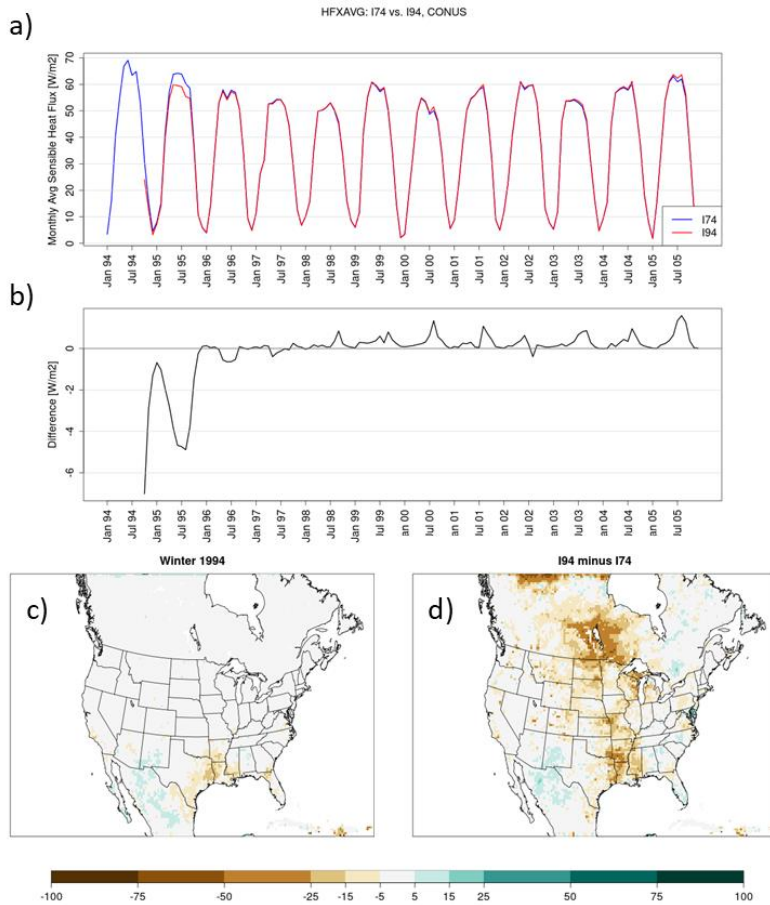

**Figure 7.** As in Fig. 2 but for sensible heat flux [ $\text{W m}^{-2}$ ].

210

The seasonal variations in latent heat flux simulated by both I94 and I74 are driven by multiple factors. In the Noah LSM, evapotranspiration within a grid cell is the sum of evaporation from bare soil, evaporation from a wet canopy, and transpiration from plants (Chen and Dudhia, 2001). All three components are directly related to the rate of potential evaporation,  $E_p$ . The Noah LSM also includes inhibiting factors that can prevent evaporation from occurring at this rate, such as vegetation wilting

215 and the partitioning of evaporation (between bare soil and the canopy) based on the fraction of green vegetation (e.g., Chen and Dudhia, 2001; Ek et al., 2003; Chaney et al., 2016). The formulation of  $E_p$  within the Noah LSM is based on the Penman approach implemented by Mahrt and Ek (1984), where  $E_p$  is proportional to the saturation specific humidity of the overlying atmosphere, which is a function of near-surface atmospheric temperatures. As temperatures decrease throughout the winter, saturation vapor pressure deficits decrease. At the same time, reduced leaf-area index (LAI) results in less transpiration out of  
220 the canopy, hampering evaporation within the grid cell. During summer, moisture demand and LAI increase, among other changes, resulting in the robust seasonal cycle of latent heat flux simulated by both I94 and I74 (Fig. 6a).

The relatively wet initial soil state in I94 (Figs. 4b and 5b) results in increased evaporation following initialization, but differences between average soil moisture within I94 and I74 are suppressed over the first winter (3-5 months into the I94 simulation), when evaporation is suppressed by the seasonal influences. Meanwhile, mid- and lower-layer soil moisture remain  
225 high in I94 relative to I74 (Figs. 5b and 5c). During the following summer, the greater soil moisture in all soil layers, along with seasonally increased saturation deficits in the overlying atmosphere, supports further increases in evaporation and latent heat flux in the I94 simulation (relative to I74) over time (Figs. 4d, 5d, 6d). Evaporative cooling contributes to cooler temperatures in I94 (compared with I74) over the warm season (Fig. 2d).

Monthly precipitation in I94 features minimal differences compared to the reference simulation over the first few months following initialization, with differences in CONUS-averaged precipitation of less than 1 mm/month, followed by increased precipitation in I94 peaking at ~5 mm/month the following summer as averaged over the CONUS (Figs. 8a and 8b). Increased precipitation is generally located though the central and eastern CONUS (Fig. 8d). Some areas of the Southeast do show a mixed pattern of both positive and negative precipitation differences in I94, relative to I74. However, precipitation generally increases over areas of the CONUS that experience increased latent heat release and evaporation (Fig. 6d) and increased 2-m specific humidity (not shown). As I74 and I94 feature matching boundary conditions and sea surface temperatures, enhancement of precipitation from increased moisture in the domain would be driven by differences in the initial soil state in the lower boundary condition.  
230  
235

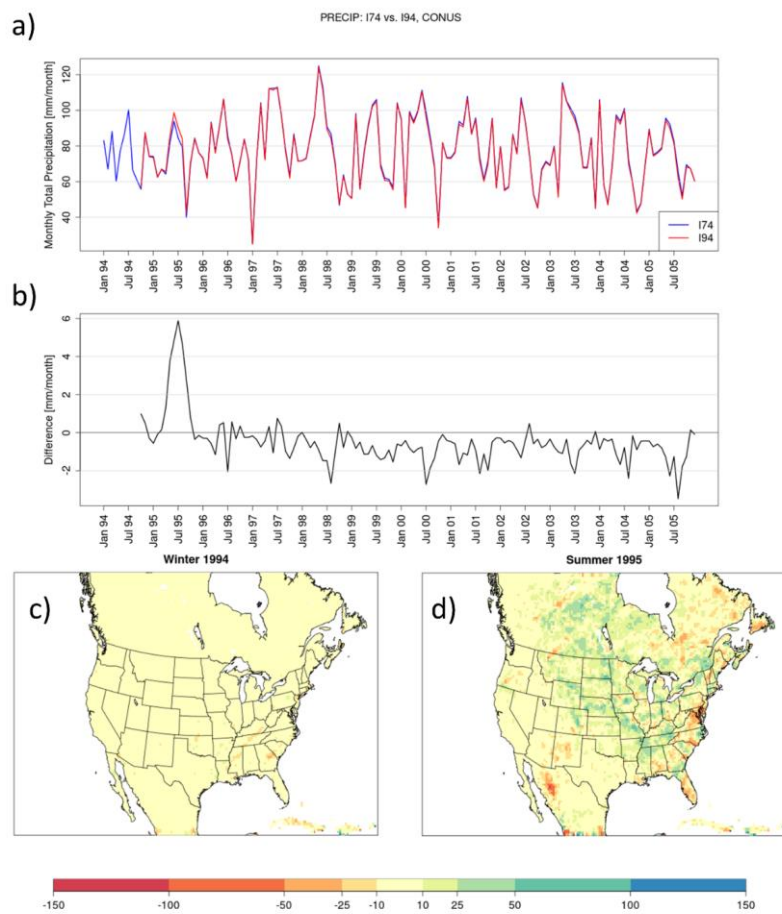

**Figure 8. As in Fig. 2 but for monthly total precipitation [mm].**

### 3.4 Quantitative Examination of Spin-up

Here, statistical criteria are used to examine spin-up times for several variables within each of the NCEI regions and over the CONUS (Table 1). For each variable, cumulative distribution functions (CDFs) are generated for each grid cell for daily-averaged fields (or daily accumulated precipitation) from the I74 and I94 simulations and then ~~compare them~~compared using the Kolmogorov-Smirnov (K-S) test (ks.test in the stats package of R version 4.3.0) where p-value  $\leq 0.05$  determines statistical significance. A 1-year window is used to generate each CDF, beginning on the first day of the simulation, then the 1-year window is incremented day-by-day until the statistical criteria are met. Here, a 1-year window is used to assess whether statistical criteria have been met so that the potential seasonal re-emergence of differences between I74 and I94 is considered in each comparison. When the criteria are met, the start date for that 1-year window is considered the time at which the spin-up period for that grid cell is sufficient. Within each region (Fig. 1), the regional spin-up time is designated as the first date when most land grid cells ( $> 50\%$ ) in that region have achieved spin-up. This methodology is similar to spin-up criteria utilized by Jerez et al. (2020), where a K-S test was used to determine when fields from an experimental simulation were statistically similar to those in the reference simulation.

This spin-up criterion can assess whether the runs have converged sufficiently to produce fields with similar distributions over an annual cycle, regardless of the timing of events. Because these CDFs include weather events throughout the year, similarly extreme events may be simulated in I74 and I94 but could be temporally displaced at a given grid point without affecting the statistical criteria for spin-up. Therefore, the comparison of CDFs provides a useful framework for examining spin-up behaviour in RCM applications. This approach may be less appropriate for applications where incipient conditions and the timing of events are more important, such as case studies or pseudo global warming experiments. Additionally, spin-up times found here can be expected to be sensitive to choice of model physics (e.g., Cosgrove et al. 2003; Jankov et al., 2007; Kleczek et al., 2014; Tewari et al., 2022).

|                                 | 2-m<br>Temperature | <u>Precipitation</u> | Top-Layer<br>Soil<br>Temperature | Bottom-Layer<br>Soil<br>Temperature | Top-Layer Soil<br>Moisture |
|---------------------------------|--------------------|----------------------|----------------------------------|-------------------------------------|----------------------------|
| CONUS<br>n=5936                 | 1-365 d            | 1-365 d              | <u>1-365 d</u>                   | 10.8                                | 21.1                       |
| Northwest<br>n=489              | 1-365 d            | 1-365 d              | <u>1-365 d</u>                   | 4.7                                 | 3.8                        |
| West<br>n=526                   | 1-365 d            | 1-365 d              | <u>1-365 d</u>                   | 3.5                                 | 11.2                       |
| N. Rockies &<br>Plains<br>n=938 | 1-365 d            | <u>3.6</u>           | 5.7                              | 22.7                                | 50.6                       |
| Southwest<br>n=841              | 1-365 d            | 1-365 d              | <u>1-365 d</u>                   | 10.1                                | 15.1                       |
| Upper<br>Midwest<br>n=508       | 1-365 d            | <u>5.8</u>           | 4.4                              | 16.9                                | 42.5                       |
| South<br>n=1114                 | 1-365 d            | <u>1-365 d</u>       | 0.9                              | 11.0                                | 18.2                       |
| Ohio Valley<br>n=608            | 1-365 d            | 1-365 d              | <u>1-365 d</u>                   | 11.0                                | 32.6                       |
| Southeast<br>n=566              | 1-365 d            | <u>1.4</u>           | 1-365 d                          | 10.8                                | 18.5                       |
| Northeast<br>n=346              | 1-365 d            | 1-365 d              | <u>1-365 d</u>                   | 4.9                                 | 12.0                       |

Inserted Cells

**Table 1. Over all 9 NCEI regions and the CONUS, the number of months until spin-up is achieved (or listing as 1-365 days where spin-up is achieved during the first annual cycle tested) for variables discussed in the text, according to the criteria described in the text. The number of grid cells is also listed for each region and the CONUS.**

Spin-up for 2-m temperature, precipitation, and top-layer soil temperature occurs within the first annual window (days 1 through 365) in most regions and over the CONUS (Table 1). However, the Northern Rockies and Plains, the Upper Midwest, and the South take 0.9-5.7 months to spin-up top-layer soil temperature. As expected, deeper soil temperatures require longer spin-up times, ranging between 3.5-22.7 months, with about 10.8 months sufficient to spin up across the CONUS. Top-layer soil moisture spin-up occurs by 21.1 months across the CONUS but varies widely regionally, with spin-up occurring as quickly as 3.8 months for the Northwest but as slowly as 50.6 months in the Northern Rockies and Plains region. The regions which experience the longest spin-up durations for top-layer soil moisture (Northern Rockies and Plains and the Upper Midwest) also feature the longest periods needed for precipitation to achieve spin-up, ranging from 3.6-5.8 months. For bottom-layer soil moisture, the criteria applied here did not result in a majority of grid cells meeting spin-up criteria over the CONUS and for several of the NCEI regions. Bottom-layer soil moisture in the West and Northwest achieve spin-up at 37.3 and 55.0 months, respectively.

Generally, prolonged spin-up times are needed for areas throughout the central CONUS.

The Northern Rockies and Plains region has and Upper Midwest regions have the longest spin-up times for all variables where regional differences are apparent, while the Upper Midwest has the second longest. These areas of the CONUS exhibit the largest seasonally-influenced differences in soil temperature and moisture in I94 relative to I74 (Figs. 3 & 4). Contrastingly, spin-up is generally achieved more quickly in the western portion of the CONUS with the shortest spin-up times for deep soil temperatures and moisture in the West, and for top-layer soil moisture in the Northwest. Here, confluence between the increased soil moisture in I94 compared with I74 plays a key role in regional spin-up of soil moisture values. Based on the idealized work of Cosgrove et al. (2003), it could be speculated that initially drier soil moisture values in the experimental simulation could result in even longer spin-up time in regions where initial differences are the largest, as that study found that an excessively wet simulation spun up more quickly than an idealized dry simulation, as described in Section 1. However, the present work does not include an idealized simulation set up with dry soil anomalies to test this hypothesis and compare directly to results from Cosgrove et al. While 1 year satisfies spin-up of 2-m and top-layer soil temperatures, spin-up periods for top-layer soil moisture exceed 1 year for most regions and over the CONUS. Therefore, while utilizing at least a year of spin-up time would mitigate the obvious seasonal signals of the spin-up behaviour highlighted above, multiple years of spin-up (~1-4) may be needed in some regions for spin-up of soil moisture (i.e., in this experiment, the Northern Rockies and Plains and the Upper Midwest).

#### 4 Conclusions

Here, spin-up behaviour is examined in an RCM, where surface and near-surface fields in an 11-year simulation, I94, are compared with those from a 31-year reference simulation, I74, that is initialized 20 years earlier. Each is driven by the same CMIP5 GCM and uses the same RCM configuration, aside from initialization date and initial model state. Prior related studies of spin-up periods in regional climate modelling have used “reference” or “control” simulations which predate their experimental runs by as much as 2 years (Jerez et al., 2020) or less than 30 days (Pan et al., 1999). The current study uses a multi-decadal period for the reference simulation, which better supports the implicit assumption that the reference run has already undergone spin-up and that comparison with it can provide a robust analysis of spin-up behaviour in the experimental simulation. This is especially important for assessing whether the soil state is spun-up, as soil processes in the model have been found to require longer spin-up times than atmospheric processes (e.g., Cosgrove et al., 2003; Jerez et al., 2020; Lavin-Gullon et al., 2023).

Comparing I94 to the reference I74 shows that key surface and near-surface variables (2-m temperature and top-layer soil temperature and moisture) exhibit a seasonally influenced pattern as they converge over the first year of the simulation (Figs. 2-4). Generally, the initial state in I94 has wetter soil moisture values and cooler near-surface and soil temperatures than I74. The model solutions artificially appear to converge over the first ~3 months from the October 1 initialization into the winter months. However, during the proceeding spring, differences between the two simulations re-emerge and reach a secondary peak the following summer.

I94 increases latent heat release and reduces sensible heat flux (Figs. 6 and 7) in response to cooler and wetter soils, following the same seasonal pattern of differences as 2-m temperature and top-layer soil temperature that are reduced in magnitude over the winter and reappeared the following summer. Meanwhile, during the initial year of the I94 simulation, deeper soil moisture values remain elevated in I94 (Fig. 5), providing additional soil moisture to drive increases the following summer when seasonally warmer temperatures support higher saturation deficits and increased evaporation. Cooler temperatures in I94 relative to I74 also re-emerge during summer 1995 (the first summer of the I94 simulation), as more near-surface evaporative cooling in the I94 run sustains cooler surface temperatures relative to I74. Precipitation increases are generally found over the central and eastern CONUS during the following summer (Fig. 8) fed by increased evaporation in I94 relative to I74.

The full annual cycle should be considered when choosing optimal spin-up for RCM applications. If analysis had been limited to a 3-month overlapping period (in this case, October-December 1994), those results would misleadingly promote a spin-up period of only a few months. However, the divergence of the simulations during the following summer indicates that RCM applications would benefit from spin-up periods that cover a minimum of one full annual cycle so that seasonally-dependent spin-up behaviour can be excluded from the period utilized for analysis for a given application. In the present work, spin-up criteria in Section 3.4.4 are applied over a moving 365-day window, as a shorter (e.g., monthly) window may produce a false positive result for spin-up having been achieved during the transitional and winter months. Even with this rigorous criteria, 2-m temperature and top-layer (0-10 cm) soil fields satisfy this condition within the first annual cycle for >50% of grid cells over



the CONUS. On average, bottom-layer soil temperatures achieve spin-up by 11 months across the CONUS except in the Upper Midwest and Northern Rockies and Plains. Top-layer soil moisture requires a longer spin-up time of ~21 months over the CONUS. While 4 out of the 9 regions satisfy the spin-up criteria for top-layer soil moisture within ~15 months, slower regional spin-up times of ~1.5 to 4 years are found for areas of the central CONUS. The large differences in soil conditions through the central CONUS between I94 and I74 resulted from differences in data used for initialization, which may vary in other months. However, prior spin-up studies discussed above share similar sensitivities in their methods. Evaporation is important for spin-up, and it is the process by which I94's solution "forgets" excessive soil moisture in its initial state and converges toward the I74 simulation. The key processes by which the newly initialized model must address anomalies in the initial conditions is known to influence the timescale in which spin-up can be achieved (Cosgrove et al., 2003). The timescales for spinning up physical and hydrological processes are also considered in the modelling practice of avoiding winter months for initialization of an RCM (as recommended by Jerez et al., 2020), as frozen soil in initial conditions is resolved through seasonal melting. When examining WRF results over multiple domains within CORDEX, Lavin-Gullon et al. (2023) found seasonal effects on spin-up time for soil moisture in South America, where warm season initializations had greater uncertainty due to their coinciding with the South American rainy season, a period of increased variability in precipitation and associated uncertainty in soil moisture. When discussing the use of splitting centennial-scale RCM projections into shorter periods for computational efficiency, Lavin-Gullon et al. (2023) recommended increased spin-up times and outlined an approach of utilizing three 30-year time slices with 5-year spin-up times to account for uncertainty in the time needed for the soil fields to spin-up.

Utilizing a minimum of one full annual cycle for spin-up time excludes the re-emergence of spurious seasonally-influenced spin-up effects that can influence key variables that are often used in RCM applications, such as seasonally and monthly averaged 2-m temperatures. Here, regional results in the central CONUS support the use of spin-up periods of 1-4 years to better exclude spin-up behaviour in top-layer soil moisture. Choice of the appropriate spin-up time for RCM applications depends on several factors and often involves weighing the added computational burden against the penalty of including the influence of spin-up within the atmospheric and land-surface fields that are most important for a given application. While less than a year of spin-up time may appear adequate for atmospheric fields like 2-m temperature, including spurious spin-up behaviour within other fields, such as soil moisture and evaporation, can cascade to projections of drought, heat stress, and flooding, among others as these moisture processes affect "downstream" fields within the RCM. Here, results support a pragmatic compromise of using at least 1 year to spin-up mid-latitude RCM simulations.

#### **Code Availability**

The WRF model is provided by NCAR, funded by the National Science Foundation. WRF can be downloaded from <https://github.com/wrf-model/WRF>. R can be downloaded from <https://cran.r-project.org/>.

#### **Data Availability**

Data from the EPA Dynamically Downscaled Ensemble (EDDE) Version 1 (<https://doi.org/10.23719/1530964>) (EPA, 2024; <https://doi.org/10.23719/1530964>), including the variables discussed here, are available from Amazon Web Services Open Data Project within the repository at <https://registry.opendata.aws/epa-edde-v1/>. Additional information on accessing EDDE can also be found at <https://www.epa.gov/climate-research/epa-dynamically-downscaled-ensemble-edde>.

#### Disclaimer

The views expressed in this article are those of the authors and do not necessarily represent the views or policies of the U.S. EPA. Any mention of trade names, manufacturers, or products does not imply an endorsement by the United States Government or the U.S. EPA. The U.S. EPA and its employees do not endorse any commercial products, services, or enterprises.

#### Author contribution

MM, TS, and AJ designed the study, carried out the I74 simulation discussed here, and analysed the simulation. TS, JB and CN also contributed to developing the I94 simulation and analysis. JW provided input into the analysis. MM wrote an original draft of this publication, and all coauthors participated in review and editing.

#### Competing interests

The authors declare that they have no conflicts of interest.

#### Acknowledgments

The authors appreciate feedback provided from technical reviews of this article from Jerold Herwehe and Chunling Tang.

#### References

- Bowden, J. H., Otte, T. L., Nolte, C. G., and M. J. Otte, M. J.: Examining interior grid nudging techniques using two-way nesting in the WRF model for regional climate modeling. *J. Climate*, 25, 2805–2823, doi:10.1175/JCLI-D-11-00167.1, 2012.
- Chaney, N. W., Herman, J. D., Ek, M. B., and Wood, E. F.: Deriving global parameter estimates for the Noah land surface model using FLUXNET and machine learning. *J. Geophys. Res. Atmos.*, 121, 13,218–13,235, doi:10.1002/2016JD024821, 2016.
- Chen, F., and Dudhia, J.: Coupling an advanced land surface–hydrology model with the Penn State–NCAR MM5 modeling system. Part I: Model implementation and sensitivity. *Mon. Wea. Rev.*, 129, 569–585, doi:10.1175/1520-0493(2001)129%3C0569:CAALSH%3E2.0.CO;2, 2001.

CORDEX: Experiment protocol CORDEX-CMIP6 RCMs. Accessed 5 March 2025, <https://cordex.org/experiment-guidelines/cordex-cmip6/experiment-protocol-cordex-cmip6-rcms/>, 2021.

Cosgrove, B. A., and Coauthors: Land surface model spin-up behavior in the North American Land Data Assimilation System (NLDAS), *J. Geophys. Res.*, 108, 8845, doi:10.1029/2002JD003316, 2003.

Denis, B., Laprise, R., Caya, D. and Côté, J.: Downscaling ability of one-way nested regional climate models: The Big-Brother Experiment. *Clim. Dyn.*, 18, 627–646, doi:10.1007/s00382-001-0201-0., 2002.

Ek, M. B., Mitchell, K. E., Lin, Y., Rogers, E., Grunmann, P., Koren, V., Gayno, G, and Tarpley, J. D.: Implementation of Noah land surface model advances in the National Centers for Environmental Prediction operational mesoscale Eta model, *J. Geophys. Res.*, 108, 8851, doi:10.1029/2002JD003296, 2003.

EPA: EPA Dynamically Downscaled Ensemble (EDDE), Version 1, doi:10.23719/1530964, 2024.

EPA: EPA Dynamically Downscaled Ensemble (EDDE). Accessed 17 January 2025, <https://www.epa.gov/climate-research/epa-dynamically-downscaled-ensemble-edde>, 2025.

Fann, N., Nolte, C. G., Dolwick, P., Spero, T. L., Brown, A. C., Phillips, S., and Anenberg, S.: The geographic distribution and economic value of climate change-related ozone health impacts in the United States in 2030, *J. Air Waste Manag. Assoc.*, 65, 570-580, doi:10.1080/10962247.2014.996270, 2015.

Gent, P. R., and Coauthors: The Community Climate System Model Version 4, *J. Climate*, 24, 4973–4991, doi:10.1175/2011JCLI4083.1, 2011.

Giorgi, F., and Mearns, L. O.: Introduction to special section: Regional climate modeling revisited. *J. Geophys. Res. Atmos.*, 104, 6335-6352, doi:10.1029/98JD02072, 1999.

Gómez, B. and Miguez-Macho, G.: The impact of wave number selection and spin-up time in spectral nudging. *Q. J. R. Meteorol. Soc.*, 143: 1772-1786, doi:10.1002/qj.3032, 2017.

425 Herwehe, J. A., Alapaty, K., Spero, T. L., and Nolte, C. G.: Increasing the credibility of regional climate simulations by  
introducing subgrid-scale cloud-radiation interactions. *J. Geophys. Res. Atmos.*, 119, 5317–5330,  
doi:10.1002/2014JD021504, 2014.

Hong, S.-Y., and Lim, J.-O. J.: The WRF single-moment 6-class microphysics scheme (WSM6). *J. Korean Meteor. Soc.*, 42,  
430 129–151, 2006.

Hong, S.-Y., Noh, Y., and Dudhia, J.: A new vertical diffusion package with an explicit treatment of entrainment processes.  
*Mon. Wea. Rev.*, 134, 2318–2341. doi:10.1175/MWR3199.1, 2006.

435 Iacono, M. J., Delamere, J. S., Mlawer, E. J., Shephard, M. W., Clough, S. A., and Collins, W. D.: Radiative forcing by long-  
lived greenhouse gases: Calculations with the AER radiative transfer models. *J. Geophys. Res.: Atmos.*, 113, D13103,  
doi:10.1029/2008JD009944, 2008.

Jalowska, A.M., Spero, T. L., and Bowden, J. H.: Projecting changes in extreme rainfall from three tropical cyclones using  
440 the design-rainfall approach. *npj Clim. Atmos. Sci.*, 4, 23, doi:10.1038/s41612-021-00176-9, 2021.

Jankov, I., Gallus, W. A., Segal, M., and Koch, S. E.: Influence of Initial Conditions on the WRF–ARW Model QPF  
Response to Physical Parameterization Changes. *Wea. Forecasting*, 22, 501–519, doi:10.1175/WAF998.1, 2007.

445 Jerez, S., López-Romero, J. M., Turco, M., Lorente-Plazas, R., Gómez-Navarro, J. J., Jiménez-Guerrero, P., and Montávez,  
J. P.: On the spin-up period in WRF simulations over Europe: Trade-offs between length and seasonality. *J. Adv. Model.*  
*Earth Syst.*, 12, e2019MS001945, doi:10.1029/2019MS001945, 2020.

Jimenez, P. A., Dudhia, J., Gonzalez-Rouco, J. F., Navarro, J., Montávez, J. P., and Garcia-Bustamante, E.: A revised  
450 scheme for the WRF surface layer formulation, *Mon. Wea. Rev.*, 140, 898–918, doi:10.1175/MWR-D-11-00056.1, 2012.

Kain, J. S.: The Kain–Fritsch convective parameterization: An update. *J. Appl. Meteor. and Climatol.*, 43, 170–181.  
doi:10.1175/1520-0450(2004)043<0170:TKCPAU>2.0.CO;2, 2004.

455 Kleczek, M. A., Steeneveld, G. J., and Holtslag, A. A. M.: Evaluation of the Weather Research and Forecasting Mesoscale  
Model for GABLS3: Impact of Boundary-Layer Schemes, Boundary Conditions and Spin-Up. *Bound.-Layer Meteorol.*, 152,  
213–243, doi:10.1007/s10546-014-9925-3, 2014.

460 Lavin-Gullon, A., Milovac, J., and García-Díez, M.: Spin-up time and internal variability analysis for overlapping time slices  
in a regional climate model. *Clim. Dyn.*, 61, 47–64, doi:10.1007/s00382-022-06560-2, 2023.

Loveland, T. R., Reed, B. C., Brown, J. F., Ohlen, D. O., Zhu, J., Yang, L., and Merchant, J. W.: Development of a global  
land cover characteristics database and IGBP DISCover from 1-km AVHRR data. *Int. J. Remote Sens.*, 21, 1303–1330,  
doi:10.1080/014311600210191, 2000.

465 Leduc, M., and Laprise, R: Regional climate model sensitivity to domain size. *Clim. Dyn.*, 32, 833–854,  
doi:10.1007/s00382-008-0400-z, 2009.

Liu, Y., Zhuo, L., and Han, D.: Developing spin-up time framework for WRF extreme precipitation simulations. *J. Hydrol.*,  
470 620, doi:10.1016/j.jhydrol.2023.129443, 2023.

Mahrt, L., and Ek, M.: The influence of atmospheric stability on potential evaporation. *J. Climate Appl. Meteor.*, 23, 222–  
234, doi:10.1175/1520-0450(1984)023<0222:TIOASO>2.0.CO;2, 1984.

475 Mallard, M. S., Spero, T. L., and Taylor, S. M.: Examining WRF's sensitivity to contemporary land use datasets across the  
contiguous U.S. using dynamical downscaling. *J. Appl. Meteor. Climatol.*, 57, 2561–2583, doi:10.1175/JAMC-D-17-0328.1,  
2018.

Mallard, M. S., Talgo, K. D., Spero, T. L., Bowden, J. H., and Nolte, C. G.: Dynamically downscaled projections of  
480 phenological changes across the contiguous United States. *J. Appl. Meteor. Climatol.*, 62, 1875–1889, doi:10.1175/JAMC-D-  
23-0071.1, 2023.

Miguez-Macho, G., Stenchikov, G. L., and Robock, A.: Spectral nudging to eliminate the effects of domain position and  
geometry in regional climate model simulations. *J. Geophys. Res. Atmos.*, 109, D13104, doi:10.1029/2003JD004495, 2004.

485 Nolte, C. G., Spero, T. L., Bowden, J. H., Mallard, M. S., and Dolwick, P. D.: The potential effects of climate change on air  
quality across the conterminous US at 2030 under three representative concentration pathways. *Atmospheric Chem. Phys.*,  
18, 15 471–15 489, doi:10.5194/acp-18-15471-2018, 2018.

490 Nolte, C. G., Spero, T. L., Bowden, J. H., Sarofim, M. C., Martinich, J., and Mallard, M. S.: Regional temperature-ozone  
relationships across the U.S. under multiple climate and emissions scenarios. *J. Air Waste Manag. Assoc.*, 71, 1251–1264.  
doi:10.1080/10962247.2021.1970048, 2021.

Otte, T. L., Nolte, C. G., Otte, M. J., and Bowden, J. H.: Does nudging squelch the extremes in regional climate modeling? J. Climate, 25, 7046–7066, doi:10.1175/JCLI-D-12-00048.1, 2012.

Pan, Z. T., Takle, E., Gutowski, W., and Turner, R.: Long simulation of regional climate as a sequence of short segments. Mon. Wea. Rev., 127, 308–321, doi:10.1175/1520-0493(1999)127%3C0308:LSORCA%3E2.0.CO;2, 1999.

Rahimi, S., and Coauthors: An overview of the Western United States Dynamically Downscaled Dataset (WUS-D3), Geosci. Model Dev., 17, 2265–2286, doi:10.5194/gmd-17-2265-2024, 2024.

Skamarock, W. C., and Klemp, J. B.: A time-split nonhydrostatic atmospheric model for weather research and forecasting applications. J. Comput. Phys., 227, 3465–3485, doi:10.1016/j.jcp.2007.01.037, 2008.

Spero, T. L., Nolte, C. G., Bowden, J. H., Mallard, M. S., and Herwehe, J. A.: The impact of incongruous lake temperatures on regional climate extremes downscaled from the CMIP5 archive using the WRF model. J. Climate, 29, 839–853, doi:10.1175/JCLI-D-15-0233.1, 2016.

Spero, T. L., and Coauthors: EPA Dynamically Downscaled Ensemble (EDDE): Datasets for adaptation and resilience planning for environmental endpoints. Bull. Amer. Meteor. Soc., ~~submitted for publication~~106, 1539–1557, doi:10.1175/BAMS-D-24-0251.1, 2025.

Taylor, K. E., Stouffer, R. J., and Meehl, G. A.: An overview of CMIP5 and the experiment design. Bull. Amer. Meteor. Soc., 93, 485–498, doi:10.1175/BAMS-D-11-00094.1, 2012.

Tewari, M., Chen, F., Dudhia, J., Ray, P., Miao, S., Nikolopoulos, E., and Treinish, L.: Understanding the sensitivity of WRF hindcast of Beijing extreme rainfall of 21 July 2012 to microphysics and model initial time. Atmos. Res, 271, doi:10.1016/j.atmosres.2022.106085, 2022.

van Vuuren, D. P., and Coauthors: The representative concentration pathways: An overview. Clim. Change, 109, 5, doi:10.1007/s10584-011-0148-z, 2011.
